1 Bacteriophages encoding human immune evasion factors adapt to  
2 livestock-associated MRSA through rounds of integration and excision

3 Helena Leinweber<sup>1</sup>, Raphael Sieber<sup>2</sup>, Jesper Larsen<sup>2</sup>, Marc Stegger<sup>2</sup>, Hanne Ingmer<sup>1\*</sup>.

4 <sup>1</sup>Department of Veterinary and Animal Sciences, University of Copenhagen, Stigbøjlen 4, 1870

5 Copenhagen, Denmark

6 <sup>2</sup>Department of Bacteria, Parasites and Fungi, Statens Serum Institut, Artillerivej 5, 2300

7 Copenhagen, Denmark.

8 \*Hanne Ingmer.

9 **Email:** [hi@sund.ku.dk](mailto:hi@sund.ku.dk)

10

11 **ORCID numbers:**

12 Helena Leinweber 0000-0002-9949-819X

13 Raphael Sieber 0000-0002-0372-128X

14 Jesper Larsen 0000-0003-0582-0457

15 Marc Stegger 0000-0003-0321-1180

16 Hanne Ingmer 0000-0002-8350-5631

17

18 **Author Contributions:**

19 H.L. and H.I. designed the study, H.L. generated experimental data, did formal analysis, wrote the

20 manuscript and visualized the data; R.S. supported bioinformatic analysis; J.L. provided strain

21 material; M.S. conducted sequencing; H.L., H.I., R.S., M.S. J.L. conducted review and editing; H.I.

22 provided funding acquisition and project administration.

23 **Competing Interest Statement:** The authors declare no conflict of interest.

24 **Keywords:** Livestock MRSA, CC398, Sa3Int, phi13, Φ13, excision, alternative integration, tyrosine

25 recombinase, attP, attB

26 **This file includes:**

27 Main Text, Figures 1, 2 and 3, Tables 1 and 2

28

## 29 Abstract

30 In recent years there has been an increase in human infections with methicillin-resistant  
31 *Staphylococcus aureus* (MRSA) originating from livestock and strains carrying bacterial viruses of  
32 the Sa3int-family have disseminated into the community. Sa3int phages express immune evasion  
33 factors and are common in human staphylococcal strains. As the bacterial attachment site (*attB*) for  
34 Sa3int phages is mutated in livestock-associated strains, the integration frequency is low and a key  
35 question is how the phages are established. Here we show that Sa3int phages adapt to alternative  
36 bacterial integration sites by mutating the phage attachment sequence, *attP*, leading to enhanced  
37 integration at these sites. Using a model strain carrying the mutated *attB<sub>LA</sub>* of livestock-associated  
38 strains we find that once established, the Sa3int phage, Φ13 is inducible with release of  
39 heterogenous phage populations carrying mutations in *attP* that in part increase homology to  
40 alternative integration sites or *attB<sub>LA</sub>*. Compared to the original phage, the adaptive mutations  
41 increase phage integration in new rounds of infection. Also, Sa3int phages induced from livestock-  
42 associated outbreak strains reveal mutated *attP* sequences. We suspect that promiscuity of the  
43 phage-encoded recombinase allows this adaptation and propose it may explain how phages  
44 mediate "host jumps" that are regularly observed for staphylococcal lineages.

45

46

## 47 Introduction

48 *Staphylococcus aureus* colonizes both humans and animals and its preference is associated with  
49 the content of mobile genetic elements<sup>1</sup>. One example is the prophages of the Sa3int family. These  
50 bacterial viruses are found in most human strains of *S. aureus* where they express one or more  
51 immune evasion factors believed to facilitate human colonization as well as to promote human-to-  
52 human transmission<sup>2,3</sup>. In contrast, the methicillin-resistant *S. aureus* found in livestock (LA-MRSA)  
53 commonly lack Sa3int phages<sup>4,5</sup>. In fact, LA-MRSA of the CC398 lineage have been derived from  
54 human-associated strains which, subsequent to a jump from humans to animals, lost the Sa3int  
55 prophage<sup>4</sup>.

56 Despite host preference, there is a growing number of human infections with LA-MRSA and in  
57 2019, they accounted for 32% of all new MRSA cases in Denmark (DANMAP, 2019). People with  
58 occupational livestock contact are most at risk<sup>6-8</sup> and the infections appear equally severe as those  
59 caused by human-associated strains<sup>9</sup>. Although human infections with LA-MRSA are considered to  
60 be the result of spillovers from livestock, there have been examples of transmissions between  
61 household members as well as into community and healthcare settings<sup>3,7,8</sup>. Importantly, such  
62 transfer events were associated with LA-MRSA strains carrying prophages of the Sa3int family  
63<sup>3,7,8,10</sup>. Since 95% of tested Danish pig herds are positive for LA-MRSA (DANMAP, 2019),  
64 establishment of Sa3int phages in these strains may pose an increased risk of community spread of  
65 LA-MRSA strains.

66 Integration of Sa3int phages in *S. aureus* occurs through orientation-specific recombination  
67 between identical 14bp phage and bacterial core attachment sequences (*attP* and *attB*,  
68 respectively) and is mediated by the phage-encoded tyrosine recombinase, Int<sup>11,12</sup>. In livestock  
69 strains, the sequence corresponding to *attB* has two nucleotide changes as underlined 5'-  
70 TGTATCCGAATTGG-3' (*attB<sub>LA</sub>*). These substitutions do not alter the amino acid sequence of the  $\beta$ -  
71 hemolysin encoded by *hlyB* in which *attB* is located, but significantly decrease the ability of Sa3int  
72 phages to insert at this location<sup>13</sup>. Accordingly, in LA-MRSA strains Sa3int prophages are mostly  
73 located at variable positions in the bacterial genome but occasionally also in *attB<sub>LA</sub>*<sup>7,13-16</sup>.

74 The ability of *S. aureus* to change its preference for human or animal hosts has been observed  
75 several times. Such "host jumps" are thought to arise from "spillover" events where infections of  
76 less preferred hosts are followed by host adaptation ultimately leading to colonization<sup>7,17</sup>. Host  
77 adaptation often involves acquisition or loss of mobile genetic elements such as prophages<sup>1</sup> but  
78 little is known of the molecular events involved. Using massive parallel sequencing we have  
79 examined Sa3int phages excised from alternative integration sites and find phage populations with  
80 variable *attP* sequences of which a greater part increase resemblance to the bacterial attachment  
81 sequence. Infections of naïve strains carrying the *attB<sub>LA</sub>* site with such phage pools result in  
82 increased phage integration. Our results explain how Sa3int phages, by adapting to alternative  
83 integration sites in LA-MRSA strains, can establish in these strains that ultimately may be more  
84 successful at colonizing and infecting humans and to disseminate in the human population.

85

86

## 87 **Results**

### 88 **Sa3int phages are adapting to alternative *attB* sites of LA-MRSA CC398**

89 In a recent study, 20 LA-MRSA CC398 strains from pigs and humans in Denmark were isolated and  
90 found to contain Sa3int prophages. In these strains the prophages were located at one of five  
91 different genomic locations (variant I-VI) <sup>7</sup> and the 14bp bacterial integration site carried two  
92 nucleotide mismatches (designated *attB<sub>LA</sub>*) compared to the one found in human strains in other  
93 studies of LA-MRSA strains <sup>13,15,16</sup>. In the LA-MRSA CC398 genomes we determined the  
94 sequences flanking the prophage (*attL* and *attR*) and through comparisons with strains that lack the  
95 prophage, we deduced the corresponding *attB* sequences (Table 1). In all cases except one  
96 (variant V), the *attL* sequences differed from *attR*. This indicates non-matching *attB* and *attP* sites,  
97 as otherwise *attR* and *attL* would be identical, as seen with the original *attB*-site in *hIb* of *S. aureus*  
98 8325-4.

99

100 To examine if mismatches between *attL* and *attR* affected excision of the prophage, we induced the  
101 lysogens with mitomycin and observed that in all strains the phages could be excised. From the  
102 resulting phages we determined the *attP* sequences using PCR amplification and Sanger  
103 sequencing (Table 1). For eight phages (one isolate of variant II, variant IV, variant V and five  
104 isolates of variant VI), the *attP* sequences were identical to that of the model Sa3int phage  $\Phi 13$  <sup>11</sup>,  
105 showing that in these cases integration in the variant *attB* sites did not affect the *attP* sequence of  
106 the excised phage. In the remaining 12 phages however, mutations had arisen in the phage *attP*  
107 sequences. Importantly, in all cases the changes increased the sequence similarity between *attP*  
108 and the alternative *attB* site of the livestock-associated strains, as indicated in Table 1. These  
109 results indicate that Sa3int phages may be promiscuous with respect to both integration and  
110 excision and that integration of prophages at alternative bacterial attachment sites may alter the  
111 phage in such a way that its *attP* sequence bears greater resemblance to alternative *attB*  
112 sequences.

113

114 **Phage integration at multiple locations in a model strain carrying *attB<sub>LA</sub>***

115 To examine the interactions between Sa3int phages and LA-MRSA strains in greater detail, we  
116 employed a derivative of *S. aureus* NCTC8325-4, designated *S. aureus* 8325-4attBmut, which  
117 contains 2bp point-mutations in *hly* to create the *attB<sub>LA</sub>* of the LA-MRSA CC398 lineage<sup>13</sup>. With this  
118 strain we performed liquid infection with  $\Phi$ 13kan<sup>R</sup>, a derivative of the Sa3int phage,  $\Phi$ 13 that  
119 encodes the staphylokinase (*sak*) but in which the immune evasion virulence genes *scn* and *chp*  
120 are replaced by the kanamycin resistance cassette *aphA3*<sup>13</sup>.

121 From eight independent lysogenization experiments we selected 22 lysogens being resistant to  
122 kanamycin. Alternative integration sites were confirmed for 20 of the lysogens by PCR (*hly*+, *sak*+) and two lysogens harbored the phage in the mutated *hly* site (*hly*-, *sak*+) (Supplementary Figure  
123 S1). The 22 isolates were whole-genome sequenced and analysis revealed 17 different integration  
124 sites for  $\Phi$ 13kan<sup>R</sup> in *S. aureus* 8325-4attBmut that were widely distributed across the bacterial  
125 chromosome (Supplementary Figure S2) and with the *attB* sequences listed in Figure 1. The  
126 integrations occurred in both non-coding and coding regions and were independent of  
127 transcriptional orientation.  
128

129 When comparing the 14bp sequences of all alternative *attB* sites (Figure 1), they showed 29-86%  
130 homology compared to the original *attB* core sequence in the *hly* gene. However, the last three  
131 base pairs (5'-TGG-'3) were highly conserved, being present in 20 out of 22 *attB* sites with lysogens  
132 6 and 20 being the exceptions. The nucleotides G at position 8 and T at position 11 signifying the  
133 *attB<sub>LA</sub>* compared to *attB*, were not found in the same combination in any of the 17 *attB* sequences.  
134 Based on the conserved base pairs between the alternative *attB*-sites, we searched the  
135 chromosome of *S. aureus* NCTC8325 for the presence of 5'-NNNNNNCWNNCTGG-'3 (where W =  
136 A/T) and obtained more than 700 hits. Thus, there appears to be a multitude of potential integration  
137 sites in the staphylococcal genome.

138 Three of the alternative *attB* locations were observed as integration sites in lysogens obtained in  
139 independent lysogenization rounds, i.e. SAOUHSC\_01067 CDS conserved hypothetical protein  
140 (lysogens 1,14 and 18), the intergenic region between open reading frames encoding hypothetical  
141 proteins SAOUHSC\_01301 and SAOUHSC\_01304 (lysogens 5 and 13) and SAOUHSC\_00125

142 *cap5L* protein/glycosyltransferase (lysogens 10 and 21). As clonality can be excluded, these  
143 integration events show that there is some preference in selection of integration site when the bona  
144 fide *attB* sequence is mutated. However, when we screened the 300bp flanking regions of the  
145 alternative *attB* sites we found no common patterns in terms of sequence composition or distance of  
146 inverted repeats relative to the alternative *attB* core sequences ( Supplementary Figure S3 and S4).  
147 Thus, it is still unclear why some integration sites are preferred over others.

148

#### 149 **Phage evolution following excision from alternative integration sites**

150 Similar to what we had observed for Sa3int phages in livestock-associated strains, we found that  
151 mitomycin C induced  $\Phi 13\text{kan}^R$  from all lysogens established in the 8325-4attBmut strain with the  
152 number of phage particles varying between  $5 \times 10^3$  plaque-forming units (pfu)/ml and  $4 \times 10^6$  pfu/ml  
153 (Supplementary Figure S5). This represents up to 1000-fold decrease in induction efficacy  
154 compared to the  $6 \times 10^6$  pfu/ml obtained when the phage was induced from its integration site in the  
155 non-mutated *attB* of *S. aureus* 8325-4 (8325-4phi13kan<sup>R</sup> control). Spontaneous phage release was  
156 also detected for many of the lysogens ranging from  $2 \times 10^1$  to  $3 \times 10^3$  pfu/ml compared to  $1,0 \times 10^4$   
157 pfu/ml for the 8325-4phi13kan<sup>R</sup> control (Supplementary Figure S5).

158 To examine the integration and excision process of  $\Phi 13\text{kan}^R$  at the alternative integration sites, we  
159 determined the *attL* and *attR* from the genome sequences of the lysogens and deduced the  
160 alternative *attB* sites by comparing with sequences prior to integration of the phage. In addition, we  
161 determined the *attP* sequences by induction of the lysogens and amplicon sequencing of PCR  
162 products obtained on phage lysate with primers spanning *attP* (sequencing depth range 10.000-  
163 180.000, average 100.000).

164 For the majority of the lysogens (Table 2, part A), *attL* was identical to *attB*, and *attR* was identical  
165 to *attP* as can be observed by the bold red nucleotides marking the nucleotide differences in the  
166 alternative *attB* site sequences compared to the original *attB*. For these lysogens, the integration  
167 cross-over likely occurred at the 5'-TGG-3' (Supplementary Figure S6a). For the remaining  
168 lysogens (Table 2, part B), both *attL* and *attR* displayed sequences matching the alternative *attB*  
169 site with *attL* matching the 5'-end and *attR* the 3'-end. In these cases, the integration cross-over

170 events may have occurred at variable positions within the core sequences (Supplementary Figure  
171 S6b).

172 When assessing *attP* by amplicon sequencing we observed remarkable sequence variation at  
173 single nucleotide positions in more than 40% of the phage populations obtained from 9 of the  
174 lysogens (Figure 2). When comparing these changes to the sequence of the bacterial integration  
175 site from which the phage was derived, we saw that in five instances (lysogens 3, 10, 12, 17 and  
176 21) the excised phages displayed adaptation to the alternative *attB* site by adopting a nucleotide of  
177 the alternative *attB* sequence (Figure 2). Phages from lysogens 6, 7, 15, and 23 also displayed  
178 single nucleotide substitutions in *attP* but without matching the alternative *attB* sequences. These  
179 may result from mismatch repair during excision.

180 The adaptability of the phage to the alternative integration sites was even more pronounced when  
181 all sequence variation >1% was scored (Figure 2). Importantly most of the excised phage pools  
182 contained variants with sequence changes adopting the nucleotides of the alternative *attB*  
183 sequences and multiple sequence variations occurred within the individual pools (Figure 2, green).  
184 Notable exceptions were lysogens 1, 14 and 18, where no variants >1% were observed. In these  
185 lysogens,  $\Phi 13\text{kan}^R$  had independently integrated in the same *attB* site and despite 7 mismatches  
186 with the 14 bp *attB* from 8325-4, resolution to the original *attP* sequence occurred with the same  
187 precision as seen when  $\Phi 13\text{kan}^R$  excised from *attB* of 8325-4 $\Phi 13\text{kan}^R$ . In summary, our results  
188 demonstrate that excision of  $\Phi 13\text{kan}^R$  from alternative integration sites leads to evolutionary  
189 adaptation of the phage to the bacterium by increasing the number of *attP* nucleotides matching the  
190 alternative *attB* sequences.

191

### 192 **Phage adaptation to alternative *attB* site**

193 After observing that induction of phages at alternative integration sites led to mutated phage  
194 populations with increased base pair matches between *attP* and the alternative *attB* sites or *attB<sub>LA</sub>*,  
195 we wondered whether these phages, in comparison to the original  $\Phi 13\text{kan}^R$ , had increased  
196 preference for such sites in a new infection cycle. To address this we quantified integration by  
197 qPCR with primer pairs covering *attR*. We examined phage pools obtained from lysogen 2 and 7  
198 (designated  $\Phi\text{lys}2$  and  $\Phi\text{lys}7$ ) excised from the *attB<sub>LA</sub>* and compared them to the original  $\Phi 13\text{kan}^R$



199 with respect to integration in either 8325-4 or 8325-4attBmut (Figure 3). As expected, we found that  
200 for the wildtype, homogeneous  $\Phi$ 13kan<sup>R</sup> there were much less integration in *attB*<sub>LA</sub> compared to  
201 *attB* that matches the *attP* sequence. In contrast, this difference was essentially eliminated for the  
202  $\Phi$ lys2 and  $\Phi$ lys7 phage pools. Further, the mutations in these pools significantly increased the  
203 integration frequency in 8325-4attBmut when compared to  $\Phi$ 13kan<sup>R</sup> with the original *attP* site. Our  
204 results show that a single round of integration and excision dramatically increases the preference of  
205 the phage for an alternative or mutated attachment site.

206

207

## 208 Discussion

209 Sa3int prophages encode immune evasion factors and are found in most human strains of *S.*  
210 *aureus*<sup>18,19</sup>. In contrast, LA-MRSA commonly lack Sa3int phages<sup>4</sup> but when present, they increase  
211 the risk of transmission between household members and into the community<sup>3,7</sup>. The integration  
212 site for Sa3int phages is naturally mutated in livestock-associated strains and so integration is  
213 infrequent and occurs at alternative sites often leading to mismatches between the *attL* and *attR*  
214 sequences. Intriguingly, we show that induction of these lysogens results in phage populations that  
215 are heterogeneous with respect to their *attP* sequences and with mutations that increase overall  
216 identity to the alternative bacterial integration site (Table 1,2 and Figure 1). Importantly, these *attP*  
217 changes increase phage integration into the naïve 8325-4attBmut in a new round of infection  
218 (Figure 3). Further we find that Sa3int prophages are spontaneously released from alternative  
219 integration sites highlighting that environmental triggers are not necessary for dissemination of  
220 these phages. Thus, rounds of excision and integration are possible with the potential for phage  
221 adaptation in each round.

222

223 When examining Sa3int prophages from outbreak strains of LA-MRSA<sup>7</sup> we observe a greater  
224 number of adaptive changes in the *attP* sites of the excised phages than from our model 8325-  
225 4attBmut strain. This suggests that adapted phages are circulating in the LA-MRSA CC398  
226 population, a notion that is supported by a study of the Sa3int phage P282 from a *S. aureus* CC398  
227 strain, where the *attP* sequence is identical to *attB*<sub>LA</sub><sup>15</sup>. Also, re-analysis of Sa3Int-prophages in

228 MRSA CC398 isolates from hospital patients in Germany<sup>16</sup> revealed that in 10 out of 15 lysogens,  
229 the *attL* and *attR* sequences were identical to *attB<sub>LA</sub>* (Supplementary Table S3) indicating that the  
230 prophages have adapted to the livestock-associated strains. This raises the question where phage  
231 adaptations may occur. Since about one in three humans is colonized with *S. aureus* of which the  
232 majority contains Sa3int phages, transfer can occur when humans, naturally colonized with *S.*  
233 *aureus*, are exposed to livestock-associated strains. Once established as a prophage in a livestock-  
234 associated strain, Sa3int phages will be released and, if adapted, will integrate more effectively than  
235 the original phage in the LA-MRSA population.

236

237 Integration at secondary sites has also been observed for other phages when the primary site is  
238 absent or mutated<sup>20-23</sup>. Excision of phage  $\lambda$  from such as site resulted in substitutions in *attP*<sup>24,25</sup>  
239 and in P2, the authors stated that the new *attP* region contained DNA from *attR*<sup>26,27</sup>. Similar to  $\Phi$ 13,  
240 these phages encode tyrosine recombinases<sup>12,22</sup>. This family of recombinases catalyzes  
241 recombination between substrates with limited sequence identity<sup>28</sup>. We propose that the adaptive  
242 behavior of Sa3int phages is depending on this promiscuity. As tyrosine-type recombinases are  
243 employed also by other *S. aureus* phages encoding virulence factors<sup>29</sup>, the results presented here  
244 may provide a broader explanation for how phages adapt to new bacterial strains and thereby  
245 enable the host jumps that are regularly observed for staphylococci<sup>1</sup>.

246

247

## 248 **Materials and Methods**

249

250 **Strains and media.** Phage-cured *S. aureus* 8325-4<sup>30</sup> and its mutant 8325-4 $\Phi$ 13attBmut<sup>13</sup> (here  
251 termed 8325-4attBmut) containing the 2bp variation in *hIb* were used as recipients and indicator  
252 strains for  $\Phi$ 13kan<sup>R</sup>. Twenty LA-*S. aureus* strains harboring a Sa3Int-phages were analyzed for  
253 their *attR* and *attL* composition<sup>7</sup>. Sequencing data available at  
254 <https://www.ebi.ac.uk/ena/browser/home> with identifiers listed in Supplementary Table S4. *S.*  
255 *aureus* S0385 (GenBank accession no. NC\_017333) were used as a reference strain for analysis of  
256 sequencing data of the LA-strains. The prophage  $\Phi$ 13kan<sup>R</sup> carries the kanamycin resistance

257 cassette *aphA3*, which replaces the virulence genes *scn* and *chp* and was obtained by induction of  
258 8325-4phi13kan<sup>R</sup> 13. A full strain list is provided in Supplementary Table S1. Strains were grown in  
259 tryptone soy broth (TSB, CM0876, Oxoid) and tryptone soy agar (TSA, CM0131, Oxoid). Top agar  
260 for the overlay assays was 0,2 ml TSA/ml TSB. Kanamycin (30 µg/ml) and sheep blood agar (5%)  
261 were used to select for lysogens.

262

263 **Lysogenization assay.** To obtain the phage stock, 8325-4phi13kan<sup>R</sup> was grown to late exponential  
264 phase (37°C, 200 rpm, OD<sub>600</sub>=0,8), mixed with 2 µl/ml mitomycin C and incubated for another 2-4  
265 hours. Phages were harvested by centrifugation for 5 min at 8150 x g and filtering the supernatant  
266 with a 0,2 µm membrane filter. The lysogens were obtained as described previously, with slight  
267 adjustments 31. In brief, Φ13kan<sup>R</sup> was added at a multiplicity of infection MOI=1 to the respective  
268 recipients, incubated 30 min on ice to allow phage attachment, the non-attached phages were  
269 washed off and after another incubation for 30 min at 37°C allowing phage infection, the culture was  
270 diluted and plated on TSA with 5% blood and 30 µg/ml kanamycin. After overnight incubation at  
271 37°C, 20 colonies showing β-hemolysis and two colonies without β-hemolysis were isolated and  
272 used for further analysis. Lysogens were derived from eight independent lysogenization  
273 experiments resulting in lysogens 1-5 (experiment 1); lysogens 6 and 7 (experiment 2), lysogen 8  
274 (experiment 3), 10 and 11 (experiment 4), 12 and 13 (experiment 5), 14 and 15 (experiment 6), 16-  
275 19 (experiment 7) and lysogens 20-23 (experiment 8).

276

277 **Spot assay and phage propagation.** Phage lysates were serially diluted in SM-buffer (100 mM  
278 NaCl, 50 mM Tris (pH=7,8), 1 mM MgSO<sub>4</sub>, 4 mM CaCl<sub>2</sub>) and spotted on recipient lawn of either *S.*  
279 *aureus* 8325-4 for pfu determination. To obtain an even lawn, 100 µl of fresh culture (OD=1) were  
280 added to 3 ml top agar and poured on a TSA-plate supplemented with 10mM CaCl<sub>2</sub>. After solidifying  
281 of the top agar, drops of 3 x 10 µl of each dilution were spotted on the lawn.

282

283 **Induction assay.** To determine the different levels of phage release, the 8325-4attBmut-lysogens  
284 were grown to OD<sub>600</sub>=0,8, and centrifuged after adding 2 µg/ml mitomycin C and further incubation

285 for 2 hours. The sterile-filtered supernatant was diluted and spotted on an overlay of 8325-4  
286 consisting of 100 µl culture mixed with 3 ml top agar.

287

288 **Whole-genome sequencing and bioinformatics analysis.** Genomic DNA was extracted by using  
289 DNeasy Blood and Tissue Kit (Qiagen) and whole genome sequences were obtained by 251bp  
290 paired-end sequencing (MiSeq, Illumina) as described previously<sup>32</sup>. Raw data can be accessed at  
291 <https://www.ebi.ac.uk/ena/browser/home> with identifiers listed in Supplementary Table S5.  
292 Genomes were assembled using SPAdes<sup>33</sup>. Geneious Prime 2020.1.1 was used to determine  
293 phage integration sites ([www.geneious.com](http://www.geneious.com)). The locations and core sequences were determined  
294 by extracting short sequences from the assembled draft genomes of the lysogens lying adjacent to  
295 the prophage and mapping it to the annotated genome of *S. aureus* 8325 (GenBank accession no.  
296 NC\_007795). Reads obtained by sequencing the PCR amplicons spanning *attP*, were mapped to  
297 the Φ13 reference genome (GenBank accession no. NC\_004617) and SNPs were called applying a  
298 variant frequency threshold of 50%. WebLogo3 was applied to detect gapped motifs in the flanking  
299 regions of the alternative *attB* sites<sup>34</sup>.

300

301 **PCR and amplicon sequencing.** Direct colony PCR was used to determine (i) the presence of the  
302 phage using *sak*-primers, (ii) the integrity of the *hly* gene using *hly*-primers and (iii) *attP* using  
303 *attP*-primers<sup>35</sup> if the phage had spontaneously excised and was present in its circular form.  
304 Primer sequences and cycling conditions are listed in Supplementary Table S2. For each reaction,  
305 a well-isolated colony was picked, suspended in 50 µl MilliQ-water, heat-lysed for 5 min at 99°C and  
306 briefly centrifuged. One µl was used as template. To determine *attP* of induced phages in lysates, 1  
307 µl of a 1:10 dilution of phage lysate was used as template. Each single reaction mix was composed  
308 of 20,375 µl water, 2,5ml Taq polymerase buffer, 1 µl each of forward and reverse primers (10 µM),  
309 0,5 µl dNTPs and 0,125 µl Taq polymerase (Thermo Fisher). PCR products were purified with  
310 GeneJET PCR purification kit (Thermo Fisher) and sequenced either using Sanger Sequencing  
311 (Mix2Seq, Eurofins Genomics) for the Sa3Int-phages deriving from the LA-MRSA strains or using  
312 Illumina MiSeq (sequencing depth varied from 10.000-180.000 (average 100.000)).

313

314 **qPCR assay.** DNA for use in the qPCR assay (LightCycler 96, Roche) was extracted using the  
315 GenElute Bacterial Genomic DNA kit (Sigma). The samples of interest were obtained by  
316 lysogenizing *S. aureus* 8325-4 and 8325-4attBmut with the respective phage ( $\Phi$ 13kanR,  $\Phi$ lys2 or  
317  $\Phi$ lys7) and plating 2 x 100  $\mu$ l of the culture on TSA supplemented with 30 $\mu$ g/ml kanamycin. After  
318 overnight incubation, the colonies were scraped off (approx. 10.000 colonies) and re-suspended in  
319 1 ml saline. Of this, 100  $\mu$ l were used directly in the first lysis step of the kit. DNA concentration was  
320 measured using a Qubit<sup>TM</sup> (Invitrogen) and diluted to 1 ng/ml of which 5  $\mu$ l were used in the qPCR  
321 reaction, consisting of 3  $\mu$ l water, 10 $\mu$ l FastStart Essential DNA Green Master 2x, 1  $\mu$ l of each  
322 forward and reverse primers (10  $\mu$ M). Primer sequences and cycling conditions can be found in  
323 Supplementary Table S2.

324

#### 325 **Data availability**

326 All genomic data used or produced in this study is deposited at the European Nucleotide Archive  
327 (<https://www.ebi.ac.uk/ena/browser/home>). Accession numbers and identifiers are listed in  
328 Supplementary Table S4 and S5.

329 Source data for the qPCR-assay and Sanger amplicon sequencing are provided with this paper.

330

#### 331 **Acknowledgments**

332

333 We thank Henrike Zschach for her contribution to the bioinformatic analysis and the staff of the  
334 Danish reference laboratory for Staphylococci at Statens Serum Institut for typing and handling of  
335 study isolates.

336 This project has received funding from the European Union's Horizon 2020 research No. 765147

337

338

339

340

#### 341 **References**

342 1. Richardson, E. J. *et al.* Gene exchange drives the ecological success of a multi-host

- 343 bacterial pathogen. *Nat. Ecol. Evol.* **2**, 1468–1478 (2018).
- 344 2. Sieber RN, Urth TR, Petersen A, Møller CH, Price LB, Skov, R. Phage-mediated immune  
345 evasion and transmission of livestock-associated methicillin-resistant *Staphylococcus*  
346 *aureus* in humans. *Emerg. Infect. Dis.* (2020).
- 347 3. McCarthy, A. J. *et al.* *Staphylococcus aureus* CC398 clade associated with human-to-human  
348 transmission. *Appl. Environ. Microbiol.* **78**, 8845–8848 (2012).
- 349 4. Price, L. B. *et al.* *Staphylococcus aureus* CC398: Host adaptation and emergence of  
350 methicillin resistance in livestock. *MBio* **3**, 1–6 (2012).
- 351 5. Cuny, C., Abdelbary, M., Layer, F., Werner, G. & Witte, W. Prevalence of the immune  
352 evasion gene cluster in *Staphylococcus aureus* CC398. *Vet. Microbiol.* **177**, 219–223 (2015).
- 353 6. Goerge, T. *et al.* MRSA colonization and infection among persons with occupational  
354 livestock exposure in Europe: Prevalence, preventive options and evidence. *Vet. Microbiol.*  
355 **200**, 6–12 (2015).
- 356 7. Sieber, R. N. *et al.* Phage-mediated immune evasion and transmission of livestock-  
357 associated methicillin-resistant *Staphylococcus aureus* in humans. *Emerg. Infect. Dis.* **26**,  
358 2578–2585 (2020).
- 359 8. Sieber, R. N. *et al.* Genome investigations show host adaptation and transmission of LA-  
360 MRSA CC398 from pigs into Danish healthcare institutions. *Sci. Rep.* **9**, 1–10 (2019).
- 361 9. Becker, K., Ballhausen, B., Kahl, B. C. & Köck, R. The clinical impact of livestock-associated  
362 methicillin-resistant *Staphylococcus aureus* of the clonal complex 398 for humans. *Vet.*  
363 *Microbiol.* **200**, 33–38 (2017).
- 364 10. Larsen, J. *et al.* Methicillin-resistant *Staphylococcus aureus* CC398 is an increasing cause of  
365 disease in people with no livestock contact in Denmark from 1999–2011. *Euro Surveill* **20**,  
366 (2015).
- 367 11. Coleman, D. *et al.* Insertional inactivation of the *Staphylococcus aureus* beta-toxin by

- 368 bacteriophage phi 13 occurs by site- and orientation-specific integration of the phi 13  
369 genome. *Mol. Microbiol.* **5**, 933–939 (1991).
- 370 12. Esposito, D. & Scocca, J. J. The integrase family of tyrosine recombinases: Evolution of a  
371 conserved active site domain. *Nucleic Acids Res.* **25**, 3605–3614 (1997).
- 372 13. Tang, Y. *et al.* Commercial biocides induce transfer of prophage  $\Phi$ 13 from human strains of  
373 *Staphylococcus aureus* to livestock CC398. *Front. Microbiol.* **8**, 1–11 (2017).
- 374 14. Kashif, A. *et al.* *Staphylococcus aureus* ST398 Virulence Is Associated With Factors Carried  
375 on Prophage  $\square$ Sa3. *Frontiers in Microbiology* vol. 10 (2019).
- 376 15. Kraushaar, B. *et al.* Acquisition of virulence factors in livestock-associated MRSA: Lysogenic  
377 conversion of CC398 strains by virulence gene-containing phages. *Sci. Rep.* **7**, 1–13 (2017).
- 378 16. Alen, S. Van, Ballhausen, B., Kaspar, U. & Köck, R. Prevalence and Genomic Structure of  
379 Bacteriophage phi3 in Human-Derived Livestock-Associated Methicillin-Resistant  
380 *Staphylococcus aureus* Isolates from 2000 to 2015. 1–11 (2018).
- 381 17. Matuszewska, M., Murray, G. G. R., Harrison, E. M., Holmes, M. A. & Weinert, L. A. The  
382 Evolutionary Genomics of Host Specificity in *Staphylococcus aureus*. *Trends Microbiol.* **28**,  
383 465–477 (2020).
- 384 18. Sung, J. M. L., Lloyd, D. H. & Lindsay, J. A. *Staphylococcus aureus* host specificity:  
385 Comparative genomics of human versus animal isolates by multi-strain microarray.  
386 *Microbiology* **154**, 1949–1959 (2008).
- 387 19. Wamel, W. J. B. Van, Rooijackers, S. H. M., Kessel, K. P. M. Van, Strijp, J. a G. Van &  
388 Ruyken, M. The Innate Immune Modulators Staphylococcal Complement Inhibitor and  
389 Chemotaxis Inhibitory Protein of *Staphylococcus aureus* Are Located on  $\beta$ -hemolysin  
390 converting Bacteriophages. *J. Bacteriol.* **188**, 1310–1315 (2006).
- 391 20. Shimada, K., Weisberg, R. A. & Gottesman, M. E. Prophage lambda at unusual  
392 chromosomal locations. II. Mutations induced by bacteriophage lambda in *Escherichia coli*  
393 K12. *J. Mol. Biol.* **80**, 297–314 (1973).

- 394 21. Shimada, K., Weisberg, R. A. & Gottesman, M. E. Prophage lambda at unusual  
395 chromosomal locations. I. Location of the secondary attachment sites and the properties of  
396 the lysogens. *J. Mol. Biol.* **63**, 483–503 (1972).
- 397 22. Serra-Moreno, R., Jofre, J. & Muniesa, M. Insertion site occupancy by stx2 bacteriophages  
398 depends on the locus availability of the host strain chromosome. *J. Bacteriol.* **189**, 6645–  
399 6654 (2007).
- 400 23. Bertani, G. & Six, E. Inheritance of prophage P2 in bacterial crosses. *Virology* **6**, 357–381  
401 (1958).
- 402 24. Weisberg, R. A., Foeller, C. & Landy, A. Role for DNA homology in site-specific  
403 recombination The isolation and characterization of a site affinity mutant of coliphage  $\lambda$ .  
404 (1983).
- 405 25. Nash, H. A. Integration and Excision of Bacteriophage  $\lambda$ : The Mechanism of Conservative  
406 Site Specific Recombination. *Annu. Rev. Genet.* **15**, 143–167 (1981).
- 407 26. Six, E. Specificity of P2 for prophage site. 1. On the chromosome of *Escherichia coli* strain  
408 C2. *Virology* **29**, 106–125 (1966).
- 409 27. Yu, A., Bertani, L. E. & Haggård-Ljungquist, E. Control of prophage integration and excision  
410 in bacteriophage P2: nucleotide sequences of the int gene and att sites. *Gene* **80**, 1–11  
411 (1989).
- 412 28. Rajeev, L., Malanowska, K. & Gardner, J. F. Challenging a Paradigm: the Role of DNA  
413 Homology in Tyrosine Recombinase Reactions. *Microbiol. Mol. Biol. Rev.* **73**, 300–309  
414 (2009).
- 415 29. Oliveira, H. *et al.* Staphylococci phages display vast genomic diversity and evolutionary  
416 relationships. *BMC Genomics* **20**, 1–14 (2019).
- 417 30. Novick, R. Properties of a cryptic high-frequency transducing phage in *Staphylococcus*  
418 *aureus*. *Virology* **33**, 155–166 (1967).



- 419 31. Pleška, M., Lang, M., Refardt, D., Levin, B. R. & Guet, C. C. Phage-host population  
420 dynamics promotes prophage acquisition in bacteria with innate immunity. *Nat. Ecol. Evol.* **2**,  
421 359–366 (2018).
- 422 32. Leinweber, H. *et al.* Vancomycin resistance in *Enterococcus faecium* isolated from Danish  
423 chicken meat is located on a pVEF4-like plasmid persisting in poultry for 18 years. *Int. J.*  
424 *Antimicrob. Agents* **52**, (2018).
- 425 33. Prjibelski, A., Antipov, D., Meleshko, D., Lapidus, A. & Korobeynikov, A. Using SPAdes De  
426 Novo Assembler. *Curr. Protoc. Bioinforma.* **70**, 1–29 (2020).
- 427 34. Crooks, G., Hon, G., Chandonia, J. & Brenner, S. WebLogo: a sequence logo generator.  
428 *Genome Res* **14**, 1188–1190 (2004).
- 429 35. Goerke, C., Koller, J. & Wolz, C. Ciprofloxacin and trimethoprim cause phage induction and  
430 virulence modulation in *Staphylococcus aureus*. *Antimicrob. Agents Chemother.* **50**, 171–  
431 177 (2006).
- 432

## List of Figures and Tables

**Table 1.** Comparison of *attP*, *attB*, *attL*, and *attR* sites of Sa3int phages from 20 LA-MRSA CC398 isolates. Magenta underlined nucleotides indicate mismatches between the  $\Phi$ 13kan<sup>R</sup> *attP* core sequence (5'-TGTATCCAAACTGG-3') and the *attB* site for each LA-MRSA CC398 isolate. Underlined nucleotides in green indicate putative adaptive changes in the *attP* site that mimic the *attB* site under the assumption that the phages contained the *attP* site core sequence upon integration into the different LA-MRSA CC398 genomes. Integration sites refer to annotated genes in *S. aureus* ST398 reference strain S0385 (GenBank accession no. NC\_017333).

**Table 2a and b.** Comparison of *attP*, *attB*, *attL*, and *attR* sites of  $\Phi$ 13kan<sup>R</sup> in 8325-4attBmut. Magenta underlined nucleotides indicate mismatches between the *attB* site in 8325-4 and the *attB* site for each lysogen. Green underlined nucleotides indicate adaptive changes in the *attP* site that mimic the *attB* site. Blue underlined nucleotides indicate other changes in the *attP* site. The threshold for variant calling was set to 50%. Part A includes the lysogens, where *attL* matches *attB* and *attR* matches *attP*. Part B includes the lysogens where parts of *attL* and *attR* both match *attB* and *attP*.

**Figure 1.** Alternative integration sites of  $\Phi$ 13kan<sup>R</sup> in *S. aureus* 8325-4attBmut. The core *attB* sites are presented by color-coding of the different base pairs (A = yellow, C = dark green, T = light green, G = grey). The mutated base pairs in *hIb* representing *attB*<sub>LA</sub> in the recipient strain are indicated by a bold frame.<sup>a)</sup> The percentages in the bottom row correspond to the proportions of conserved nucleotides in the 17 alternative *attB* sites found in the 22 lysogens with respect to the original *attB* in 8325-4.

**Figure 2.** Variant nucleotides and respective frequency (%) of the *attP* sequences after excision of the phage as determined by amplicon sequencing. The green shading of the percentages indicates adaptive changes in the *attP* site that mimic the respective alternative *attB* site. Blue shading of the percentages indicates other changes at this position. A hyphen (-) indicates that no nucleotide was detected at this respective position. Dots indicate conservation of the base pair compared to *attP* in  $\Phi$ 13kan<sup>R</sup>, the sequence of which is indicated in the first row. Note that for  $\Phi$ 13kan<sup>R</sup>,  $\Phi$ lys1,  $\Phi$ lys14 and  $\Phi$ lys18 no variants with frequencies >1% were detected across the entire *attP* sequence.

**Figure 3.** Normalized Cq-values after qPCR assay for detection of integration of evolved phages. The normalized Cq-value (calculated by  $2^{Cq(pta)-Cq(hIb)}$ ) normalizes the cycle number of the gene of interest to the reference gene *pta*. Primers are identifying integration in *hIb* (*attB* or *attB*<sub>LA</sub>) for infection of 8325-4 (dark green) or 8325-4attBmut (light green) either with  $\square$ 13kan<sup>R</sup> or the evolved phages  $\square$ lys2 and  $\square$ lys7, previously integrated at *attB*<sub>LA</sub>. Statistical analysis was carried out in GraphPad Prism 9.1.0, using Two-way ANOVA. *P* values: ns > 0,1234, \*=0,0332, \*\*=0,0021, \*\*\*=0,0002, \*\*\*\*<0,0001. Error bars represent standard deviation of three biological replicates with three technical replicates.

## Figures and Tables

**Table 1.** Comparison of *attP*, *attB*, *attL*, and *attR* sites of Sa3int phages from 20 LA-MRSA CC398 isolates. Magenta underlined nucleotides indicate mismatches between the  $\Phi$ 13kan<sup>R</sup> *attP* core sequence (5'-TGTATCCAAACTGG-3') and the *attB* site for each LA-MRSA CC398 isolate. Underlined nucleotides in green indicate putative adaptive changes in the *attP* site that mimic the *attB* site under the assumption that the phages contained the *attP* site core sequence upon integration into the different LA-MRSA CC398 genomes. Integration sites refer to annotated genes in *S. aureus* ST398 reference strain S0385 (GenBank accession no. NC\_017333).

| Variant                               | I                                                   | II                              |                                 | III                         |                         | IV                           | V                           | VI                                |                                 |
|---------------------------------------|-----------------------------------------------------|---------------------------------|---------------------------------|-----------------------------|-------------------------|------------------------------|-----------------------------|-----------------------------------|---------------------------------|
| Integration site (CDS, locus tag)     | Intergenic, between SAPIG_RS03725 and SAPIG_RS03730 | <i>sfaC</i><br>SAPIG_RS11745    |                                 | <i>sph</i><br>SAPIG_RS10795 |                         | <i>cidA</i><br>SAPIG_RS13630 | <i>sph</i><br>SAPIG_RS10795 | <i>CocE/NonD</i><br>SAPIG_RS13905 |                                 |
| No. isolates                          | 5                                                   | 1                               | 1                               | 2                           | 2                       | 1                            | 1                           | 5                                 | 2                               |
| <i>attP</i> $\Phi$ 13kan <sup>R</sup> | TGTATCCAAACTGG                                      | TGTATCCAAACTGG                  | TGTATCCAAACTGG                  | TGTATCCAAACTGG              | TGTATCCAAACTGG          | TGTATCCAAACTGG               | TGTATCCAAACTGG              | TGTATCCAAACTGG                    | TGTATCCAAACTGG                  |
| <i>attB</i>                           | <u>CTAG</u> TCC <u>TT</u> ACTG <u>T</u>             | <u>GT</u> TATCCAA <u>T</u> CTGG | <u>GT</u> TATCCAA <u>T</u> CTGG | TGTATCC <u>GAAT</u> TGG     | TGTATCC <u>GAAT</u> TGG | <u>TACCGCTAACT</u> TGG       | TGTATCC <u>GAAT</u> TGG     | <u>TT</u> TATCG <u>TTT</u> CTGG   | <u>TT</u> TATCG <u>TTT</u> CTGG |
| <i>attL</i>                           | <u>CTAG</u> TCC <u>TT</u> ACTGG                     | <u>GT</u> TATCCAA <u>T</u> CTGG | <u>GT</u> TATCCAA <u>T</u> CTGG | TGTATCC <u>GAAT</u> TGG     | TGTATCC <u>GAAT</u> TGG | <u>TACCGCTAACT</u> TGG       | TGTATCC <u>GAAT</u> TGG     | <u>TT</u> TATCG <u>TTT</u> CTGG   | <u>TT</u> TATCG <u>TTT</u> CTGG |
| <i>attR</i>                           | TGTATCC <u>TT</u> ACTG <u>T</u>                     | TGTATCCAA <u>T</u> CTGG         | TGTATCCAA <u>T</u> CTGG         | TGTATCC <u>GAAT</u> TGG     | TGTATCC <u>GAAT</u> TGG | TGTATCCAAACTGG               | TGTATCC <u>GAAT</u> TGG     | TGTATCCAAACTGG                    | TGTATCCAAACTGG                  |
| <i>attP</i> after excision            | TGTATCC <u>TT</u> ACTGG                             | TGTATCCAA <u>T</u> CTGG         | TGTATCCAAACTGG                  | TGTATCC <u>GAAT</u> TGG     | TGTATCC <u>GAAT</u> TGG | TGTATCCAAACTGG               | TGTATCCAAACTGG              | TGTATCCAAACTGG                    | TGTATCC <u>TT</u> ACTGG         |
| Adaptive changes in <i>attP</i>       | 2/7                                                 | 1/3                             | 0/3                             | 2/2                         | 1/2                     | 0/7                          | 0/2                         | 0/5                               | 2/5                             |
| Other changes in <i>attP</i>          | 0                                                   | 0                               | 0                               | 0                           | 0                       | 0                            | 0                           | 0                                 | 0                               |

**Table 2a and b.** Comparison of *attP*, *attB*, *attL*, and *attR* sites of  $\Phi$ 13kan<sup>R</sup> in 8325-4attBmut. Magenta underlined nucleotides indicate mismatches between the *attB* site in 8325-4 and the *attB* site for each lysogen. Green underlined nucleotides indicate adaptive changes in the *attP* site that mimic the *attB* site. Blue underlined nucleotides indicate other changes in the *attP* site. The threshold for variant calling was set to 50%. Part A includes the lysogens, where *attL* matches *attB* and *attR* matches *attP*. Part B includes the lysogens where parts of *attL* and *attR* both match *attB* and *attP*.

**a**

|                                    | Lysogen                |                        |                        |                        |                        |                        |                        |                        |                        |                        |
|------------------------------------|------------------------|------------------------|------------------------|------------------------|------------------------|------------------------|------------------------|------------------------|------------------------|------------------------|
|                                    | 2,7                    | 1, 14, 18              | 5, 13                  | 8                      | 10, 21                 | 11                     | 16                     | 17                     | 19                     | 22                     |
| <i>attP</i> $\Phi$ 13, <i>attB</i> | TGTATCCAAACTGG         | TGTATCCAAACTGG         | TGTATCCAAACTGG         | TGTATCCAAACTGG         | TGTATCCAAACTGG         | TGTATCCAAACTGG         | TGTATCCAAACTGG         | TGTATCCAAACTGG         | TGTATCCAAACTGG         | TGTATCCAAACTGG         |
| <i>attB</i> <sub>LA</sub>          | TGTATCC <u>GAA</u> TGG | TGTATCC <u>GAA</u> TGG | TGTATCC <u>GAA</u> TGG | TGTATCC <u>GAA</u> TGG | TGTATCC <u>GAA</u> TGG | TGTATCC <u>GAA</u> TGG | TGTATCC <u>GAA</u> TGG | TGTATCC <u>GAA</u> TGG | TGTATCC <u>GAA</u> TGG | TGTATCC <u>GAA</u> TGG |
| <i>attB</i> alternative            | TGTATCC <u>GAA</u> TGG | <u>GTTCTC</u> CACTGG   | <u>TTTC</u> CCCTGG     | <u>TTCTCA</u> CACTGG   | TG <u>ATTC</u> TAAGTGG | <u>GGTGTG</u> CAATGG   | <u>GCTC</u> GATCACTGG  | <u>TTTCTC</u> TAAGTGG  | <u>GGAG</u> TCCACTGG   | <u>CGATACTA</u> CACTGG |
| <i>attL</i>                        | TGTATCC <u>GAA</u> TGG | <u>GTTCTC</u> CACTGG   | <u>TTTC</u> CCCTGG     | <u>TTCTCA</u> CACTGG   | TG <u>ATTC</u> TAAGTGG | <u>GGTGTG</u> CAATGG   | <u>GCTC</u> GATCACTGG  | <u>TTTCTC</u> TAAGTGG  | <u>GGAG</u> TCCACTGG   | <u>CGATACTA</u> CACTGG |
| <i>attR</i>                        | TGTATCCAAACTGG         | TGTATCCAAACTGG         | TGTATCCAAACTGG         | TGTATCCAAACTGG         | TGTATCCAAACTGG         | TGTATCCAAACTGG         | TGTATCCAAACTGG         | TGTATCCAAACTGG         | TGTATCCAAACTGG         | TGTATCCAAACTGG         |
| <i>attP</i> after excision         | TGTATCCAAACTGG         | TGTATCCAAACTGG         | TGTATCCAAACTGG         | TGTATCCAAACTGG         | TGTATCC <u>AA</u> CTGG | TGTATCCAAACTGG         | TGTATCCAAACTGG         | TGTATCCAAACTGG         | TGTATCCAAACTGG         | TGTATCCAAACTGG         |
| Adaptive changes in <i>attP</i>    | 0/0                    | 0/7                    | 0/6                    | 0/4                    | <u>1/3</u>             | 0/6                    | 0/8                    | 0/5                    | 0/6                    | 0/6                    |
| Other changes in <i>attP</i>       | 0                      | 0                      | 0                      | 0                      | 0                      | 0                      | 0                      | 0                      | 0                      | 0                      |

**b**

|                                           | Lysogen                 |                         |                         |                         |                         |                        |                         |
|-------------------------------------------|-------------------------|-------------------------|-------------------------|-------------------------|-------------------------|------------------------|-------------------------|
|                                           | 3                       | 4                       | 6                       | 12                      | 15                      | 20                     | 23                      |
| <i>attP</i> $\Phi$ 13, <i>attB</i> 8325-4 | TGTATCCAAACTGG          | TGTATCCAAACTGG          | TGTATCCAAACTGG          | TGTATCCAAACTGG          | TGTATCCAAACTGG          | TGTATCCAAACTGG         | TGTATCCAAACTGG          |
| <i>attB</i> <sub>LA</sub>                 | TGTATCC <u>GAA</u> TGG  | TGTATCC <u>GAA</u> TGG  | TGTATCC <u>GAA</u> TGG  | TGTATCC <u>GAA</u> TGG  | TGTATCC <u>GAA</u> TGG  | TGTATCC <u>GAA</u> TGG | TGTATCC <u>GAA</u> TGG  |
| <i>attB</i> alternative                   | <u>GGGGA</u> CTTAAGTGG  | <u>TCAAT</u> TCTACTGG   | <u>GCTTAT</u> CAAACTGA  | <u>GTAT</u> CCAACTGG    | <u>CCACTT</u> CACTACTGG | <u>ACATCAGAGT</u> CTGA | <u>TTTGT</u> CCAAAGTGG  |
| <i>attL</i>                               | <u>GGGGA</u> CCAAACTGG  | <u>TCAAT</u> TCAAACTGG  | <u>GCTTAT</u> CAAACTGG  | <u>GTAT</u> CCAAACTGG   | <u>CCACTT</u> CACTACTGG | <u>ACATCAGAGT</u> CTGG | <u>TTTGT</u> CCAAACTGG  |
| <i>attR</i>                               | TGTATCC <u>TAA</u> CTGG | TGTATCC <u>TAA</u> CTGG | TGTATCCAACTGA           | TGTATCCAA <u>T</u> CTGG | TGTATCCAA <u>T</u> CTGG | TGTATCCAACTGA          | TGTATCCAA <u>GG</u> TGG |
| <i>attP</i> after excision                | TGTATCCAAACTGG          | TGTATCCAAACTGG          | TGTATCC <u>TAA</u> CTGG | TGTATCCAA <u>T</u> CTGG | TGTATCC <u>TAA</u> CTGG | TGTATCCAAACTGG         | TGTATCC <u>TAA</u> CTGG |
| Adaptive changes in <i>attP</i>           | 0/5                     | 0/5                     | 0/6                     | <u>1/3</u>              | 0/6                     | 0/10                   | 0/4                     |
| Other changes in <i>attP</i>              | 0                       | 0                       | <u>1</u>                | 0                       | <u>1</u>                | 0                      | <u>1</u>                |

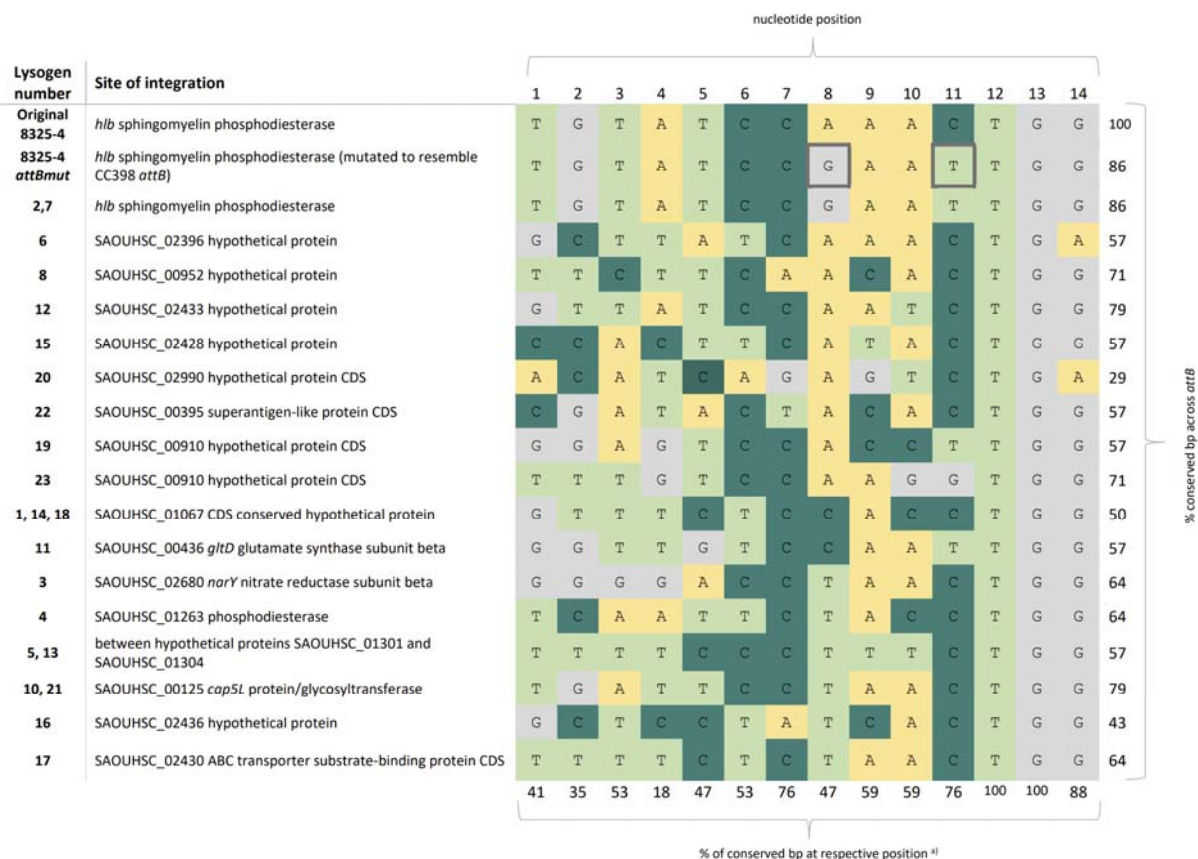

**Figure 1.** Alternative integration sites of  $\Phi 13kan^r$  in *S. aureus* 8325-4attBmut. The core *attB* sites are presented by color-coding of the different base pairs (A = yellow, C = dark green, T = light green, G = grey). The mutated base pairs in *hly* representing *attB<sub>LA</sub>* in the recipient strain are indicated by a bold frame. <sup>a)</sup> The percentages in the bottom row correspond to the proportions of conserved nucleotides in the 17 alternative *attB* sites found in the 22 lysogens with respect to the original *attB* in 8325-4.

| <i>attP</i> Φ13kan <sup>R</sup> | T | G | T     | A     | T     | C     | C              | A      | A      | A      | C                | T      | G | G | Average sequencing depth |
|---------------------------------|---|---|-------|-------|-------|-------|----------------|--------|--------|--------|------------------|--------|---|---|--------------------------|
| Φ13kan <sup>R</sup>             | . | . | .     | .     | .     | .     | .              | .      | .      | .      | .                | .      | . | . | 150,000                  |
| Φlys1                           | . | . | .     | .     | .     | .     | .              | .      | .      | .      | .                | .      | . | . | 40,000                   |
| Φlys2                           | . | . | .     | .     | .     | .     | .              | G (5)  | T (2)  | .      | T (5)            | .      | . | . | 150,000                  |
| Φlys3                           | . | . | .     | .     | .     | .     | .              | T (48) | .      | .      | .                | .      | . | . | 100,000                  |
| Φlys4                           | . | . | .     | .     | .     | .     | .              | T (9)  | .      | C (8)  | .                | .      | . | . | 180,000                  |
| Φlys5                           | . | . | .     | .     | .     | .     | .              | T (6)  | T (5)  | T (5)  | .                | .      | . | . | 70,000                   |
| Φlys6                           | . | . | .     | .     | .     | .     | .              | T (55) | .      | .      | .                | .      | . | . | 90,000                   |
| Φlys7                           | . | . | .     | .     | .     | .     | .              | G (2)  | .      | T (42) | T (2)            | .      | . | . | 90,000                   |
| Φlys8                           | . | . | .     | .     | .     | .     | - (9)          | - (9)  | .      | .      | .                | .      | . | . | 100,000                  |
| Φlys10                          | . | . | .     | .     | .     | .     | .              | T (72) | .      | .      | .                | .      | . | . | 150,000                  |
| Φlys11                          | . | . | .     | .     | .     | T (2) | .              | C (6)  | .      | T (37) | T (18)<br>- (24) | G (11) | . | . | 90,000                   |
| Φlys12                          | . | . | .     | .     | .     | .     | .              | .      | .      | T (52) | .                | .      | . | . | 160,000                  |
| Φlys13                          | . | . | .     | .     | .     | .     | .              | T (4)  | T (4)  | T (4)  | .                | .      | . | . | 90,000                   |
| Φlys14                          | . | . | .     | .     | .     | .     | .              | .      | .      | .      | .                | .      | . | . | 100,000                  |
| Φlys15                          | . | . | .     | .     | .     | .     | .              | G (57) | .      | C (21) | C (21)           | .      | . | . | 160,000                  |
| Φlys16                          | . | . | .     | .     | .     | .     | A (13)         | T (13) | C (12) | .      | T (1)            | .      | . | . | 100,000                  |
| Φlys17                          | . | . | .     | .     | .     | .     | .              | T (46) | .      | .      | .                | .      | . | . | 100,000                  |
| Φlys18                          | . | . | .     | .     | .     | .     | .              | .      | .      | .      | .                | .      | . | . | 90,000                   |
| Φlys19                          | . | . | .     | .     | .     | .     | .              | C (1)  | C (1)  | T (1)  | .                | .      | . | . | 30,000                   |
| Φlys20                          | . | . | A (1) | T (1) | C (1) | .     | G (3)<br>A (3) | G (3)  | G (4)  | T (3)  | T (2)            | C (2)  | . | . | 10,000                   |
| Φlys21                          | . | . | .     | .     | .     | .     | .              | T (50) | .      | .      | .                | .      | . | . | 120,000                  |
| Φlys22                          | . | . | .     | .     | .     | .     | T (5)          | .      | C (5)  | .      | .                | .      | . | . | 90,000                   |
| Φlys23                          | . | . | .     | .     | .     | .     | .              | T (57) | .      | G (21) | G (21)           | .      | . | . | 150,000                  |

**Figure 2.** Variant nucleotides and respective frequency (%) of the *attP* sequences after excision of the phage as determined by amplicon sequencing. The green shading of the percentages indicates adaptive changes in the *attP* site that mimic the respective alternative *attB* site. Blue shading of the percentages indicates other changes at this position. A hyphen (-) indicates that no nucleotide was detected at this respective position. Dots indicate conservation of the base pair compared to *attP* in Φ13kan<sup>R</sup>, the sequence of which is indicated in the first row. Note that for Φ13kan<sup>R</sup>, Φlys1, Φlys14 and Φlys18 no variants with frequencies >1% were detected across the entire *attP* sequence.

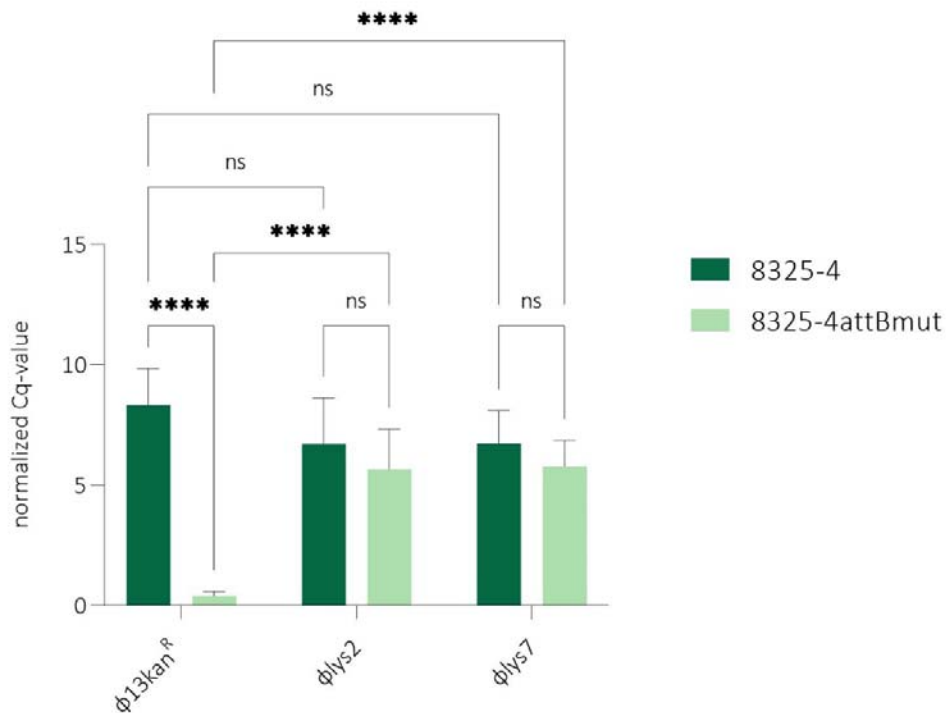

**Figure 3.** Normalized Cq-values after qPCR assay for detection of integration of evolved phages. The normalized Cq-value (calculated by  $2^{Cq(pta)-Cq(hlb)}$ ) normalizes the cycle number of the gene of interest to the reference gene *pta*. Primers are identifying integration in *hIb* (*attB* or *attB<sub>LA</sub>*) for infection of 8325-4 (dark green) or 8325-4attBmut (light green) either with  $\phi 13kan^R$  or the evolved phages  $\phi lys2$  and  $\phi lys7$ , previously integrated at *attB<sub>LA</sub>*. Statistical analysis was carried out in GraphPad Prism 9.1.0, using Two-way ANOVA. *P* values: ns > 0,1234, \* = 0,0332, \*\* = 0,0021, \*\*\* = 0,0002, \*\*\*\* < 0,0001. Error bars represent standard deviation of three biological replicates with three technical replicates.
